# Supplementary material
Source: ML conference proceedings conference paper supplement (https://aclanthology.org/2024.inlg-main.18)
Supplement: Supplementary_Attachment [file 2024.inlg-main.18.Supplementary_Attachment.pdf]

From the following text which contains a set of headings and some content within each heading:

TEXT

Extract the most important headings present in it.  
Reduce the length of each heading to five words if they are lengthy.

Table 1: Prompt to generate an outline.

Think step by step

You are given with the following title:  
{outline\_headings}

and a list of keys:  
{document\_heading\_from\_bird\_eye\_view}

Each key is associated with some text as presented in the dictionary format below:  
{bird\_eye\_view}

The task is to find 1-2 significantly matched keys. The matching should be done based on the similarity of the text associated with the keys with the given heading.  
Matching keys are: <semicolon separated list if more than a single key>

Table 2: Prompt to map slides to section.

## A Prompt to Generate an Outline

Table 1 shows the prompt that we used for generating the outline of the presentation.

## B Prompt to Map Slides to Sections

Table 2 shows the prompt that we used for mapping slides to sections.

## C Prompt to Generate Slide Content

Table 3 shows the prompt that we used for generating the slide content.

## D Prompt for the Baselines

### D.1 Prompt for GPT-Flat

Table 4 shows the prompt for GPT-Flat baseline.

You are a presentation generator from a source of text. You have to generate the slide number {slide\_index}.  
Previous slide headings and slide contents are given below in the format of a list of dictionaries.  
{previous\_slide}

Given the following slide heading and the source of text respectively, create the content of the slide number {slide\_index} such that:

1. The slide should have maximum max\_bullet bullet points.
2. Ensure that the content of the bullet points are coming strictly from the given source of text only.
3. The content of the slide is very relevant to the given slide heading
4. Each bullet point should have a maximum of 10 words
5. Ensure that this slide does not have any content repeated from the previous slides.
6. The flow of the overall presentation is nice.
7. Do not prefix the slide title before the bullet points in the output

Slide Title: HEADING  
Source of text: TEXT

Table 3: Prompt to generate slide.

You're an AI assistant that will help create a presentation from a document. You will be given section heading and paragraphs in that section. Your task is to create a presentation with ONLY ##number\_of\_slides## slides from the document. For every slide, output the slide title and bullet points in the slides. Please follow the following structure in the output. Do not output slide number.  
Slide Title: The slide title  
Bullet Points:  
New line separated bullet points

Following is the document, which contains section heading and paragraphs under that heading.  
-----Document Started-----  
##document##  
-----Document Ended-----

Presentation (only ##number\_of\_slides## slides):

Table 4: Prompt for GPT-Flat

You're an AI assistant that will help create a presentation from a document. You will be given section heading and paragraphs in that section. Your task is to create a presentation with ONLY ##number\_of\_slides## slides from the document. For every slide, output the slide title and bullet points in the slides. Please follow the steps provided below.

1. Begin by thoroughly reading and understanding the document. Identify the main points, key messages, and supporting details.
2. Find relations between different paragraphs that could be presented in the same slide.
3. Create a high-level outline for your presentation. Identify the main sections or topics that you'll cover. This will serve as the skeleton for your slides.
4. Choose the most important information from the document to include in your presentation. Focus on key messages and supporting details that align with your presentation objectives.
5. Organize the selected content into slides, maintaining a logical flow. Each slide should represent a clear point or topic, and the overall structure should make sense to your audience.
6. Make sure slides are descriptive.
7. Presentation should have only ##number\_of\_slides## slides.
8. Please follow the following structure. Do not output slide number.  
Slide Title: The slide title  
Bullet Points:  
New line separated bullet points

Following is the document, which contains section heading and paragraphs under that heading.  
-----Document Started-----  
##document##  
-----Document Ended-----

Presentation:

Table 5: Prompt for GPT-COT.

### D.2 Prompt for GPT-COT

Table 5 shows the prompt for GPT-COT baseline.

### D.3 Prompt for GPT-Cons

Table 6 shows the prompt for GPT-Cons baseline.

You're an AI assistant that will help create a presentation from a document. You will be given section heading and paragraphs in that section. Your task is to create a presentation with ONLY `##number_of_slides##` slides from the document. For every slide, output the slide title and bullet points in the slides. Please follow the steps provided below.

1. Begin by thoroughly reading and understanding the document. Identify the main points, key messages, and supporting details.
2. Find relations between different paragraphs that could be presented in the same slide.
3. Create a high-level outline for your presentation. Identify the main sections or topics that you'll cover. This will serve as the skeleton for your slides.
4. Choose the most important information from the document to include in your presentation. Focus on key messages and supporting details that align with your presentation objectives.
5. Organize the selected content into slides, maintaining a logical flow. Each slide should represent a clear point or topic, and the overall structure should make sense to your audience.
6. Make sure slides are descriptive.
7. Presentation should have only `##number_of_slides##` slides.
8. Each slide should have around 7 bullet points. Each bullet point should have around 15 words.
9. Please follow the following structure. Do not output slide number.

Slide Title: The slide title  
 Bullet Points:  
 New line separated bullet points

Following is the document, which contains section heading and paragraphs under that heading.  
 -----Document Started-----  
`##document##`  
 -----Document Ended-----

Presentation:

Table 6: Prompt for GPT-Cons

On a scale of 0-10, rate the effectiveness, clarity, and overall quality of the following text presentation, considering factors such as organization, coherence, and the ability to convey complex ideas to the audience. 0 is the lowest score, whereas 10 is the highest score.

Presentation:  
`##presentation##`

Score (an integer between 0 and 10):

Table 7: Prompt for LLM-Eval to evaluate the final presentation quality.
